# Supplementary material
Source: HighWire-hosted journal article supplement (https://www.cfp.ca/highwire/filestream/37267/field_highwire_adjunct_files/0/Appendix_1_Semi-Structured_Interview_Script.pdf)
Supplement: Appendix_1_Semi-Structured_Interview_Script.pdf [file Appendix_1_Semi-Structured_Interview_Script.pdf]

## **APPENDIX 1: SEMI-STRUCTURED INTERVIEW SCRIPT**

1. Please describe where are you from, where you grew up, and how you ended up in medical school.
2. Did you do your undergraduate medical training at a Canadian medical school?
3. At what point in your training did you decide to do family medicine?
4. What influenced your choice for where you went for residency?
5. Have any of your prior clinical experiences been in rural areas?
6. Was rural family medicine your first choice going into residency?
7. How did you feel when you learned where you'd be training?
8. How do you feel about it now?
9. Do you have family, friends or any other kind of support mechanism there?
10. Can you say a little bit about what you do and do not like about being where you are?
11. What has been the biggest adjustment you've had to make in moving to your current location?
12. Did anything help you adjust to your current location?
13. In what ways were you really prepared for your move? In what ways were you not well-prepared?
14. How did you cope with these challenges? How did you address them?
15. Is the physician community different from what you've experienced elsewhere?
16. Did you and your peers help each other to adjust to your new practice context?
17. Do you have a good sense of how you're doing within your residency, how do you know?
18. What do you plan to do at the end of the residency? Do you see yourself practicing in a similar community?
19. Are there any other issues that you think we should know about?
